# Supplementary material for: Assessment of absolute risk of life-threatening cardiac events in long QT syndrome patients
Source: PubMed Central journal article supplement (PMC9585302; doi:10.3389/fcvm.2022.988951), 2022-10-07
Supplement: Data_Sheet_1.pdf [file Data_Sheet_1.pdf]

## Supplementary materials

### Supplemental Methods

To predict 5-year risk for a female patient whose age at enrollment was between 8 and 13 years, the 5-year prediction window needs to be divided into two intervals: enrollment to <13 years and 13 years to 5 years post enrollment. The 5-year risk can then be computed using the following formula:

$$1 - S(t_1|z_0) * \frac{S(t_2|z_1)}{S(t_1|z_1)}$$

where  $z_0$  denotes the patient's risk score at enrollment,  $S(t_1|z_0)$  denotes the cumulative event-free survival probability from enrollment to age 13 (i.e.  $t_1=13$ -age at enrollment) if the risk score were to remain fixed at  $z_0$  from enrollment to age 13,  $z_1$  denotes the new risk score accounting for change in time-dependent age (from before to after age 13) and thus in the effect estimate of female (all other risk factors remained the same as they were at baseline),  $S(t_2|z_1)$  denotes the cumulative event-free survival probability from enrollment to 5 years post enrollment (i.e.  $t_2= 5$  years), if the risk score were to remain fixed at  $z_1$  from enrollment to 5 years post enrollment, and  $S(t_1|z_1)$  denotes the cumulative event-free survival probability from enrollment to age 13, if the risk score were to remain fixed at  $z_1$  from enrollment to age 13.

As can be inferred from the above notations,  $\frac{S(t_2|z_1)}{S(t_1|z_1)}$  is the conditional survival (conditional on event-free survival to age 13 years) from age 13 to 5 years post enrollment. Given that by using this formula, any evolution of the patient's covariate pattern from time 0 to time  $t_1$  (e.g. from enrollment to age 13) has been completely conditioned away, this predicted conditional survival function depends only on the portion of the baseline hazard from time  $t_1$  to time  $t_2$  (i.e.

from age 13 years to 5 years post enrollment) and on the covariate pattern trajectory from time  $t_1$  to time  $t_2$ .

### Examples of calculating predicted 5-year risk

The cumulative event-free survival from time 0 (i.e. enrollment) to time  $t$  for an individual with any given risk score (assuming that the risk score will remain fixed from time 0 to time  $t$ ) can be calculated using the equation:

$$S(t|z = \text{risk score}) = S_0(t) \exp(\sum_{i=1}^p \beta_i x_i - \text{reference risk score}),$$

where  $S_0(t)$  is the survival function (cumulative event-free survival probability from time 0 to time  $t$ ) for a patient with the reference risk score. In the examples below, the reference patient (risk score=0) in the phenotypic cohort was defined as a male patient with a QTc of 470ms, age at enrollment < 10 years, no syncope history, and off beta blockers. The reference patient in the genotypic cohort was defined as a male LQT1 patient with a QTc of 470ms, age at enrollment < 10 years, no syncope history, and off beta blockers.

Example 1: A 20-year-old male patient with a QTc = 550ms and a history of syncope while on beta blockers. Assuming that his risk factors will not change and he will be continuously treated by beta blockers, his 5-year risk of a life-threatening arrhythmic event since age 20y can be calculated as

$$\begin{aligned} \hat{P}_{\text{endpoint at 5y since age 20y}} &= 1 - S(5y|z) \\ &= 1 - 0.983232 \exp\left(0.08246 * \left[\frac{550-470}{10}\right] - 1.16373 + 1.76929 - 0.57985\right) \\ &= 1 - 0.983232 \exp(0.68539) = 3.3\%, \end{aligned}$$

where 0.983232 is the 5- year event-free survival from time 0 (i.e. enrollment) for a reference patient.

Example 2: A 10-year-old girl with a QTc of 510 ms and a single LQT2 mutation. She has no syncope history. Assuming that her risk factors will not change and she will be continuously treated by beta blockers, her 5-year risk of a life-threatening arrhythmic event since age 10 can be calculated using the following formulae:

$$\begin{aligned} S(3y|z_0) &= 0.994282 \exp\left(0.02349 \times \left[\frac{510-470}{10}\right] - 0.60304 - 0.73255 - 1.91856 + 0.36233\right) \\ &= 0.994282 \exp(-2.79786) \end{aligned}$$

$$\begin{aligned} S(3y|z_1) &= 0.994282 \exp\left(0.02349 \times \left[\frac{510-470}{10}\right] - 0.60304 - 0.73255 + 0.58295 + 0.36233\right) \\ &= 0.994282 \exp(-0.29635) \end{aligned}$$

$$\begin{aligned} S(5y|z_1) &= 0.989449 \exp\left(0.02349 \times \left[\frac{510-470}{10}\right] - 0.60304 - 0.73255 + 0.58295 + 0.36233\right) \\ &= 0.989449 \exp(-0.29635) \end{aligned}$$

$$\begin{aligned} \hat{P}_{\text{endpoint at 5y since age 10y}} &= 1 - S(3y|z_0) \times \frac{S(5y|z_1)}{S(3y|z_1)} \\ &= 1 - 0.994282 \exp(-2.79786) \times \left(\frac{0.989449}{0.994282}\right)^{\exp(-0.29635)} = 0.4\%, \end{aligned}$$

where  $Z_0$  denotes the risk score at age 10 years and  $Z_1$  denotes the risk score at age 13 years. As can be seen from the formula, the level of each risk factor remains the same as it is at age 10. The only change is the beta for female (changed from  $-1.91856$  to  $0.58295$  from  $< 13$  years to  $\geq 13$  years). Baseline survival probabilities 0.994282 and 0.989449 are the cumulative event-free survival probabilities from time 0 (i.e. enrollment, age 10) to age 13 years and age 15 years, respectively, for a reference patient.

We identified 236 mutations from 352 families in our genotypic cohort. Twelve of the 352 families had more than one mutation (all individual patients had single mutation). Table S1-S3 provide a list of these identified mutations, along with the number of families and individual patients carrying each mutation. Number of penetrance was defined as the number of individual carriers with a QTc  $\geq$  470ms, and percentage of penetrance was defined as the percentage of individual carriers with a QTc  $\geq$  470ms.

| Table S1. List of mutations identified in the genotypic cohort-LQT1 |                    |                    |                                |             |             |
|---------------------------------------------------------------------|--------------------|--------------------|--------------------------------|-------------|-------------|
| Mutation                                                            | Number of families | Number of patients | Number of patients with events | #penetrance | %penetrance |
| 448 insG                                                            | 1                  | 3                  | 0                              | 1           | 33%         |
| 639+5G>A                                                            | 1                  | 3                  | 0                              | 2           | 67%         |
| A150fs/133                                                          | 1                  | 4                  | 0                              | 2           | 50%         |
| A178P                                                               | 1                  | 5                  | 0                              | 2           | 40%         |
| A178T                                                               | 1                  | 1                  | 0                              | 1           | 100%        |
| A302E                                                               | 1                  | 1                  | 0                              | 1           | 100%        |
| A302V                                                               | 1                  | 4                  | 0                              | 0           | 0%          |
| A341E                                                               | 2                  | 11                 | 0                              | 5           | 45%         |
| A341V                                                               | 2                  | 4                  | 0                              | 4           | 100%        |
| A344/sp                                                             | 1                  | 1                  | 0                              | 1           | 100%        |
| A344A/sp                                                            | 3                  | 24                 | 1                              | 16          | 67%         |
| A344V                                                               | 1                  | 1                  | 0                              | 1           | 100%        |
| A46T                                                                | 1                  | 6                  | 0                              | 1           | 17%         |
| A525T                                                               | 1                  | 3                  | 0                              | 1           | 33%         |
| A590T                                                               | 1                  | 2                  | 0                              | 0           | 0%          |
| D242Y                                                               | 1                  | 2                  | 0                              | 1           | 50%         |
| D317G                                                               | 1                  | 3                  | 1                              | 3           | 100%        |
| E160K                                                               | 1                  | 8                  | 3                              | 5           | 63%         |
| E284K                                                               | 1                  | 2                  | 0                              | 2           | 100%        |
| F340del                                                             | 1                  | 1                  | 0                              | 1           | 100%        |
| G168R                                                               | 9                  | 68                 | 0                              | 40          | 59%         |
| G269D                                                               | 1                  | 20                 | 0                              | 9           | 45%         |
| G269S                                                               | 5                  | 25                 | 0                              | 14          | 56%         |
| G292D                                                               | 1                  | 1                  | 0                              | 0           | 0%          |
| G314S                                                               | 3                  | 6                  | 1                              | 3           | 50%         |
| G325R                                                               | 3                  | 5                  | 0                              | 4           | 80%         |
| G568R                                                               | 3                  | 9                  | 1                              | 7           | 78%         |

|                |   |    |   |    |      |
|----------------|---|----|---|----|------|
| G57V           | 1 | 1  | 0 | 0  | 0%   |
| H455Y          | 1 | 2  | 0 | 1  | 50%  |
| I567S          | 1 | 2  | 0 | 1  | 50%  |
| I567T          | 3 | 6  | 0 | 4  | 67%  |
| IVS1+3G>C      | 1 | 3  | 0 | 1  | 33%  |
| IVS10-1<br>G>T | 1 | 5  | 0 | 1  | 20%  |
| IVS2+5<br>G>A  | 3 | 5  | 0 | 2  | 40%  |
| K557E          | 1 | 2  | 0 | 2  | 100% |
| K598K          | 1 | 12 | 2 | 4  | 33%  |
| L191fs+90X     | 1 | 2  | 0 | 2  | 100% |
| L191fs/90      | 3 | 6  | 0 | 2  | 33%  |
| L250P          | 1 | 1  | 0 | 1  | 100% |
| L266P          | 7 | 23 | 1 | 19 | 83%  |
| L273F          | 6 | 17 | 0 | 12 | 71%  |
| L353P          | 1 | 3  | 0 | 2  | 67%  |
| M1V            | 1 | 1  | 0 | 0  | 0%   |
| M520R          | 1 | 2  | 0 | 1  | 50%  |
| P343S          | 1 | 1  | 0 | 1  | 100% |
| P400fs/62      | 1 | 4  | 0 | 3  | 75%  |
| Q530X          | 2 | 12 | 0 | 6  | 50%  |
| R174C          | 1 | 2  | 0 | 2  | 100% |
| R190Q          | 1 | 1  | 0 | 0  | 0%   |
| R190W          | 1 | 4  | 0 | 1  | 25%  |
| R195fs/40      | 1 | 3  | 0 | 1  | 33%  |
| R243C          | 3 | 5  | 0 | 2  | 40%  |
| R259C          | 1 | 7  | 1 | 2  | 29%  |
| R259L          | 2 | 4  | 0 | 3  | 75%  |
| R360G          | 1 | 3  | 0 | 3  | 100% |
| R366W          | 1 | 5  | 0 | 3  | 60%  |
| R452Q          | 1 | 2  | 0 | 0  | 0%   |
| R518Q          | 1 | 1  | 0 | 0  | 0%   |
| R518X          | 7 | 15 | 0 | 7  | 47%  |
| R539W          | 1 | 1  | 0 | 1  | 100% |
| R555C          | 2 | 8  | 0 | 6  | 75%  |
| R562S          | 1 | 3  | 0 | 3  | 100% |
| R591H          | 2 | 10 | 0 | 7  | 70%  |
| R594Q          | 3 | 7  | 0 | 3  | 43%  |
| S225L          | 5 | 12 | 0 | 8  | 67%  |
| S276del        | 1 | 1  | 0 | 1  | 100% |
| S277L          | 1 | 4  | 0 | 2  | 50%  |

|            |   |    |   |    |      |
|------------|---|----|---|----|------|
| S277del    | 1 | 2  | 0 | 0  | 0%   |
| S349W      | 3 | 13 | 2 | 3  | 23%  |
| S349X      | 1 | 8  | 0 | 2  | 25%  |
| S389Y      | 1 | 1  | 0 | 1  | 100% |
| S546L      | 3 | 4  | 0 | 3  | 75%  |
| S566F      | 2 | 2  | 1 | 2  | 100% |
| T312I      | 1 | 8  | 0 | 7  | 88%  |
| V254M      | 6 | 67 | 1 | 47 | 70%  |
| V307del sp | 1 | 2  | 0 | 2  | 100% |
| V310I      | 1 | 2  | 0 | 0  | 0%   |
| V524G      | 2 | 6  | 0 | 4  | 67%  |
| V576I      | 1 | 1  | 0 | 1  | 100% |
| W188X      | 1 | 1  | 1 | 1  | 100% |
| W305C      | 1 | 2  | 0 | 2  | 100% |
| W305S      | 1 | 12 | 0 | 5  | 42%  |
| Y171X      | 2 | 9  | 1 | 5  | 56%  |
| Y281C      | 1 | 3  | 0 | 1  | 33%  |
| Y315C      | 2 | 8  | 0 | 1  | 13%  |

| Table S2. List of mutations identified in the genotypic cohort-LQT2 |                    |                    |                                |             |             |
|---------------------------------------------------------------------|--------------------|--------------------|--------------------------------|-------------|-------------|
| Mutations                                                           | Number of families | Number of patients | Number of patients with events | #penetrance | %penetrance |
| 1157P fs+111X                                                       | 1                  | 9                  | 0                              | 3           | 33%         |
| A561T                                                               | 3                  | 5                  | 2                              | 4           | 80%         |
| A561V                                                               | 5                  | 12                 | 1                              | 9           | 75%         |
| A614V                                                               | 5                  | 13                 | 1                              | 11          | 85%         |
| A78P                                                                | 1                  | 2                  | 0                              | 0           | 0%          |
| A83fs/37                                                            | 1                  | 1                  | 0                              | 1           | 100%        |
| A913V                                                               | 1                  | 2                  | 0                              | 0           | 0%          |
| C39R                                                                | 1                  | 2                  | 0                              | 0           | 0%          |
| C44X                                                                | 1                  | 2                  | 0                              | 1           | 50%         |
| C52AfsX8                                                            | 1                  | 1                  | 0                              | 0           | 0%          |
| D102A                                                               | 1                  | 2                  | 0                              | 1           | 50%         |
| D501G                                                               | 1                  | 3                  | 0                              | 1           | 33%         |
| D501N                                                               | 1                  | 1                  | 0                              | 1           | 100%        |
| D609N                                                               | 1                  | 5                  | 0                              | 4           | 80%         |
| D774Y                                                               | 2                  | 2                  | 0                              | 2           | 100%        |
| D793fs                                                              | 1                  | 2                  | 0                              | 1           | 50%         |
| D837G                                                               | 2                  | 3                  | 0                              | 1           | 33%         |
| D837Y                                                               | 1                  | 1                  | 0                              | 1           | 100%        |

|             |   |    |   |    |      |
|-------------|---|----|---|----|------|
| E214X       | 1 | 6  | 0 | 3  | 50%  |
| E788D       | 1 | 3  | 1 | 1  | 33%  |
| E788K       | 1 | 4  | 0 | 1  | 25%  |
| E900fsX973  | 1 | 1  | 0 | 1  | 100% |
| E90K        | 1 | 1  | 0 | 0  | 0%   |
| E929fs      | 1 | 1  | 0 | 0  | 0%   |
| F29L        | 1 | 6  | 1 | 2  | 33%  |
| F627L       | 1 | 2  | 2 | 1  | 50%  |
| F805C       | 1 | 6  | 0 | 6  | 100% |
| F805S       | 1 | 1  | 0 | 1  | 100% |
| G1006AfsX51 | 1 | 1  | 0 | 0  | 0%   |
| G1036D      | 1 | 7  | 0 | 0  | 0%   |
| G306W       | 1 | 2  | 0 | 1  | 50%  |
| G47V        | 1 | 7  | 1 | 4  | 57%  |
| G53R        | 1 | 6  | 0 | 5  | 83%  |
| G584S       | 3 | 7  | 0 | 3  | 43%  |
| G601S       | 1 | 4  | 0 | 0  | 0%   |
| G604S       | 2 | 6  | 0 | 3  | 50%  |
| G626fsX713  | 1 | 5  | 0 | 2  | 40%  |
| G628S       | 1 | 1  | 0 | 1  | 100% |
| G648S       | 1 | 3  | 0 | 2  | 67%  |
| G657S       | 1 | 1  | 1 | 1  | 100% |
| G749V       | 1 | 3  | 0 | 1  | 33%  |
| G903R       | 1 | 2  | 0 | 0  | 0%   |
| G921fsX973  | 2 | 3  | 0 | 1  | 33%  |
| G925VfsX49  | 1 | 2  | 0 | 2  | 100% |
| G969VfsX5   | 1 | 4  | 0 | 1  | 25%  |
| H309fs51X   | 1 | 7  | 0 | 4  | 57%  |
| H70R        | 5 | 19 | 1 | 11 | 58%  |
| H739HfsX63  | 1 | 1  | 0 | 0  | 0%   |
| I31T        | 1 | 1  | 0 | 0  | 0%   |
| I571L       | 2 | 6  | 0 | 2  | 33%  |
| I571M       | 1 | 1  | 0 | 1  | 100% |
| I593R       | 1 | 4  | 0 | 3  | 75%  |
| I711V       | 1 | 5  | 0 | 0  | 0%   |
| K638E       | 1 | 3  | 1 | 3  | 100% |
| K638del     | 1 | 1  | 0 | 0  | 0%   |
| L1066V      | 1 | 4  | 0 | 1  | 25%  |
| L296CfsX64  | 1 | 4  | 0 | 3  | 75%  |
| L380fsX433  | 1 | 8  | 0 | 4  | 50%  |
| L552S       | 1 | 2  | 0 | 1  | 50%  |

|              |   |    |   |   |      |
|--------------|---|----|---|---|------|
| L615F        | 1 | 3  | 0 | 3 | 100% |
| L799spl?     | 3 | 4  | 0 | 3 | 75%  |
| L86R         | 1 | 8  | 0 | 7 | 88%  |
| L987CfsX70   | 1 | 1  | 0 | 1 | 100% |
| M554fsX721   | 1 | 2  | 0 | 0 | 0%   |
| M756V        | 1 | 2  | 0 | 2 | 100% |
| N33T         | 2 | 8  | 0 | 0 | 0%   |
| N629I        | 1 | 1  | 0 | 1 | 100% |
| N629S        | 2 | 3  | 0 | 3 | 100% |
| N633S        | 1 | 4  | 1 | 4 | 100% |
| N861I        | 1 | 3  | 0 | 2 | 67%  |
| N996I        | 1 | 6  | 0 | 6 | 100% |
| P1075L       | 1 | 1  | 0 | 1 | 100% |
| P151+179X    | 1 | 7  | 1 | 1 | 14%  |
| P310fsX359   | 1 | 1  | 0 | 1 | 100% |
| P596L        | 1 | 2  | 0 | 2 | 100% |
| P632A        | 1 | 2  | 0 | 2 | 100% |
| P721L        | 1 | 2  | 0 | 2 | 100% |
| P72L         | 1 | 6  | 0 | 6 | 100% |
| P72Q         | 3 | 14 | 1 | 6 | 43%  |
| P902QfsX71   | 1 | 2  | 0 | 2 | 100% |
| P926fsX940   | 2 | 2  | 0 | 2 | 100% |
| P968fs       | 1 | 2  | 1 | 1 | 50%  |
| Q1046fs      | 1 | 1  | 0 | 0 | 0%   |
| Q11X         | 1 | 2  | 0 | 2 | 100% |
| Q376spl?     | 4 | 16 | 0 | 3 | 19%  |
| Q450X        | 1 | 3  | 0 | 3 | 100% |
| Q576SfsX18   | 1 | 1  | 0 | 0 | 0%   |
| R1005fs+50X  | 1 | 1  | 0 | 1 | 100% |
| R1014X       | 3 | 8  | 0 | 5 | 63%  |
| R1035G fsX22 | 1 | 1  | 0 | 0 | 0%   |
| R1035fsX1056 | 2 | 5  | 0 | 3 | 60%  |
| R148W        | 1 | 4  | 0 | 1 | 25%  |
| R176PfsX156  | 1 | 1  | 0 | 1 | 100% |
| R176W        | 3 | 5  | 0 | 1 | 20%  |
| R181fs/20    | 1 | 1  | 0 | 0 | 0%   |
| R366X        | 2 | 6  | 0 | 3 | 50%  |
| R534C        | 2 | 2  | 0 | 1 | 50%  |
| R56Q         | 2 | 13 | 0 | 7 | 54%  |
| R582C        | 1 | 1  | 0 | 0 | 0%   |
| R685H        | 1 | 2  | 0 | 0 | 0%   |



|            |   |    |   |    |      |
|------------|---|----|---|----|------|
| R744X      | 1 | 1  | 0 | 1  | 100% |
| R752W      | 3 | 28 | 0 | 11 | 39%  |
| R784Y      | 1 | 1  | 0 | 1  | 100% |
| R823W      | 2 | 10 | 0 | 7  | 70%  |
| R954fs+X   | 1 | 1  | 0 | 1  | 100% |
| S182X      | 1 | 4  | 0 | 1  | 25%  |
| S250X      | 1 | 1  | 0 | 0  | 0%   |
| S26I       | 1 | 4  | 0 | 2  | 50%  |
| S428X      | 1 | 1  | 0 | 1  | 100% |
| S818L      | 2 | 16 | 0 | 10 | 63%  |
| S855R      | 1 | 4  | 0 | 0  | 0%   |
| S937N      | 1 | 2  | 0 | 0  | 0%   |
| T613M      | 4 | 4  | 0 | 4  | 100% |
| V377fs+9X  | 1 | 2  | 0 | 2  | 100% |
| V612L      | 1 | 1  | 0 | 1  | 100% |
| V822M      | 2 | 26 | 1 | 12 | 46%  |
| W1001X     | 2 | 30 | 1 | 16 | 53%  |
| W398X      | 1 | 1  | 0 | 1  | 100% |
| W410S      | 1 | 3  | 0 | 2  | 67%  |
| W568fsX593 | 1 | 15 | 1 | 7  | 47%  |
| W585X      | 1 | 1  | 0 | 1  | 100% |
| Y493H      | 1 | 1  | 0 | 1  | 100% |
| Y597C      | 1 | 2  | 0 | 2  | 100% |

| Table S3. List of mutations identified in the genotypic cohort-LQT3 |                    |                    |                                |             |             |
|---------------------------------------------------------------------|--------------------|--------------------|--------------------------------|-------------|-------------|
| Mutations                                                           | Number of families | Number of patients | Number of patients with events | #penetrance | %penetrance |
| A1088T                                                              | 1                  | 1                  | 0                              | 1           | 100%        |
| A1330T                                                              | 1                  | 1                  | 0                              | 0           | 0%          |
| E1781G                                                              | 1                  | 1                  | 0                              | 1           | 100%        |
| E1784K                                                              | 6                  | 27                 | 2                              | 21          | 78%         |
| F1596I                                                              | 1                  | 1                  | 0                              | 0           | 0%          |
| F1617del                                                            | 1                  | 1                  | 0                              | 0           | 0%          |
| G615E                                                               | 1                  | 3                  | 0                              | 1           | 33%         |
| I1448L                                                              | 1                  | 1                  | 0                              | 0           | 0%          |
| I1470T                                                              | 1                  | 1                  | 0                              | 1           | 100%        |
| I1768V                                                              | 1                  | 20                 | 1                              | 7           | 35%         |
| L1501V                                                              | 1                  | 2                  | 0                              | 1           | 50%         |
| L1560F                                                              | 1                  | 2                  | 0                              | 0           | 0%          |

|                |   |    |   |    |      |
|----------------|---|----|---|----|------|
| M1766V         | 1 | 8  | 2 | 2  | 25%  |
| N1325S         | 1 | 10 | 1 | 3  | 30%  |
| N406K          | 1 | 1  | 0 | 0  | 0%   |
| P1021S         | 1 | 2  | 0 | 1  | 50%  |
| P627L          | 1 | 1  | 0 | 0  | 0%   |
| Q1507_P1509del | 4 | 41 | 3 | 30 | 73%  |
| Q692K          | 1 | 1  | 0 | 0  | 0%   |
| R1623L         | 1 | 2  | 1 | 0  | 0%   |
| S216L          | 1 | 6  | 0 | 0  | 0%   |
| T1304M         | 2 | 6  | 0 | 0  | 0%   |
| T1779M         | 1 | 4  | 0 | 1  | 25%  |
| T370M          | 1 | 10 | 0 | 0  | 0%   |
| V1667I         | 1 | 1  | 0 | 1  | 100% |
| V1777M         | 1 | 1  | 0 | 1  | 100% |
| Y1795C         | 1 | 1  | 1 | 1  | 100% |
| Y314H          | 1 | 1  | 0 | 0  | 0%   |
